# Supplementary material for: Fossil Biomarkers and Biosignatures Preserved in Coprolites Reveal Carnivorous Diets in the Carboniferous Mazon Creek Ecosystem
Source: MDPI journal article supplement (doi:10.3390/biology11091289), 2022-08-30
Supplement: s1 [file s1]

## Supplementary Materials

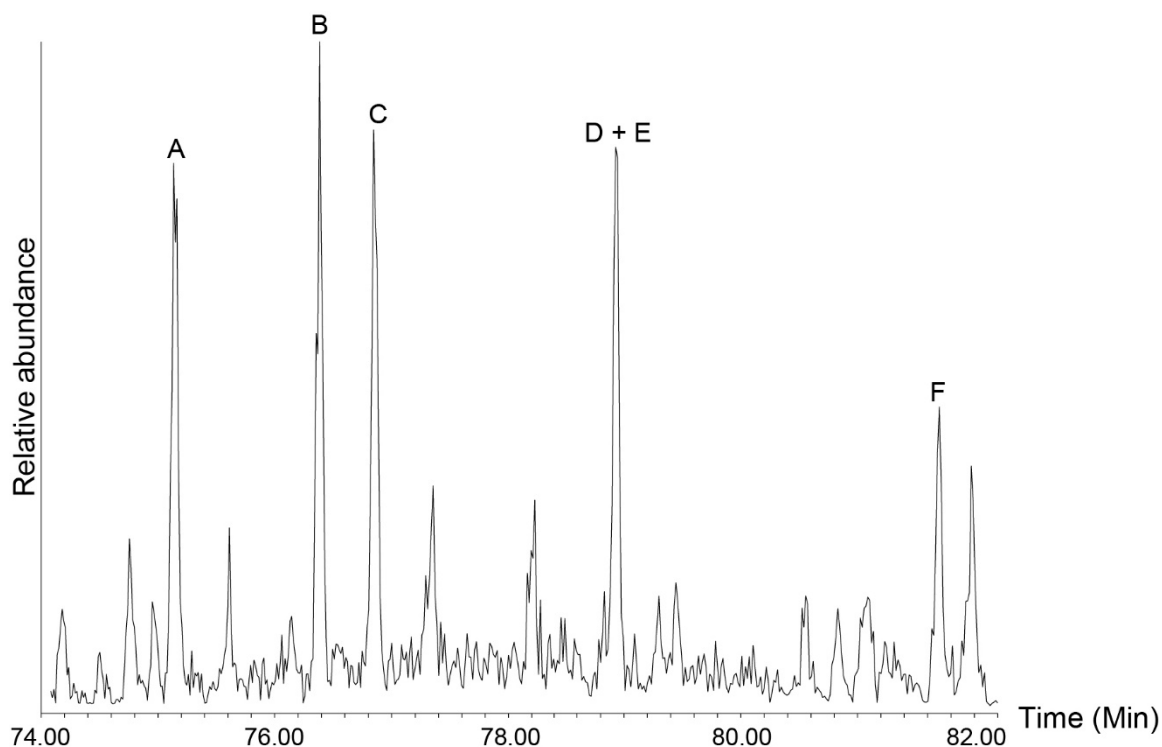

**Figure S1:** GC-MS  $m/z$  257 chromatogram of aliphatic fraction showing presence of diasterenes. A:  $10\alpha$ ,  $\Delta^{13}(17)$  diacholestene 20S; B:  $10\alpha$ ,  $\Delta^{13}(17)$  diacholestene 20R; C:  $10\alpha$ ,  $\Delta^{13}(17)$  24-methyldiacholestene 20S (\*Tentatively identified based on location of *R*-isomer and mass spectrum); D: $10\alpha$ ,  $\Delta^{13}(17)$  24-methyldiacholestene 20R; E:  $10\alpha$ ,  $\Delta^{13}(17)$  24-ethyldiacholestene 20S; F:  $10\alpha$ ,  $\Delta^{13}(17)$  24-ethyldiacholestene 20R. Compounds were tentatively identified based on comparison of retention time and peak patterns with sample where compounds had been previously identified [e.g. 26 ], confirmed using mass spectrum of peaks.

26. Melendez I, Grice K, Schwark L. Exceptional preservation of Palaeozoic steroids in a diagenetic continuum. *Scientific Reports*. 2013;3:2768.
