# Supplementary material for: Fossil Biomarkers and Biosignatures Preserved in Coprolites Reveal Carnivorous Diets in the Carboniferous Mazon Creek Ecosystem
Source: Biology (Basel). 2022 Aug 30;11(9):1289. doi: 10.3390/biology11091289 (PMC9495973; doi:10.3390/biology11091289)
Supplement: Supplementary file 1 [file biology-11-01289-s001.zip › Supplementary Materials Table S1.xlsx]

## Sheet: Figure 4A
Sample number in PCA	Catalogue number		Figure 4A
Invertebrate 1	YPM 18891 Shrimp (Acanthotelson) cuticle
Invertebrate 2	YPM 18910 Shrimp (Acanthotelson) cuticle
Invertebrate 3	YPM 19754 Shrimp (Palaeocaris) cuticle
Invertebrate 4	YPM 50639 Horseshoe crab (Euproops) cuticle
Invertebrate 5	YPM 53988 Shrimp (Acanthotelson) cuticle
Invertebrate 6	YPM 53990 Shrimp (Acanthotelson) cuticle
Annelid 1	YPM 539746 Polychaete (Esconites) bristle [chitin]
Annelid 2	YPM 539746 Polychaete (Esconites) jaw [crosslinked collagen]
Vertebrate 1	FMNH PE 7063 Tullimonstrum eye
Vertebrate 2	FMNH PE 7063 Tullimonstrum tooth
Vertebrate 3	FMNH PE 40113 Tullimonstrum eye
Vertebrate 4	FMNH PE 40113 Tullimonstrum eye bar
Vertebrate 5	FMNH PE 40113 Tullimonstrum notochord
Vertebrate 6	FMNH PE 22056 Tullimonstrum buccal apparatus region
Vertebrate 7	FMNH PE 22056 Tullimonstrum tooth
Vertebrate 8	FMNH PE 22056 Tullimonstrum tooth
Vertebrate 9	FMNH PE 22056 Tullimonstrum tooth
Invertebrate 7	FMNH PE 39344 Mollusc (Paleocadmus) radula
Vertebrate 10	YPM 7764 Chondrychthian egg case (Paleoxyris)
Vertebrate 11	FMNH PE 8167 chordate (Mayomyzon) eye
Vertebrate 12	FMNH PE 8488 chordate (Gilpichthys) tooth
Vertebrate 13	FMNH PE 8904 chordate (Mayomyzon) eye
Vertebrate 14	FMNH PE 8488 chordate (Gilpichthys) tooth
Vertebrate 15	FMNH PE 5688 chordate (Mayomyzon) cartilaginous plate
Vertebrate 16	FMNH PE 8904 chordate (Gilpichthys) tooth
Vertebrate 17	FMNH PE 8348 chordate (Gilpichthys) tooth
Vertebrate 18	FMNH PE 8167 chordate (Mayomyzon) eye
Vertebrate 19	FMNH PE 8348 chordate (Gilpichthys) tooth
Vertebrate 20	FMNH PE 8449 chordate (Gilpichthys) tooth
Vertebrate 21	FMNH PE 15354 chordate chondrychthian tooth
Vertebrate 22	FMNH PE 15354 chordate (Gilpichthys) tooth
Plant 1	PP 26465 Neuropteris vermicularis leaf
Plant 2	PP 39376 Diplozites unita leaflet
Plant 3	Uncatalogued (1) Alethopteris serlii leaf
Plant 4	Uncatalogued (2) Pecopteris sp. leaflet
Coprolite 1	FMNH PE52316
Coprolite 2	FMNH PE52336

## Sheet: Figure 4B
Sample number in PCA	Catalogue number		Figure 4B
Invertebrate 1	YPM 18891 Shrimp (Acanthotelson) cuticle
Invertebrate 2	YPM 18910 Shrimp (Acanthotelson) cuticle
Invertebrate 3	YPM 19754 Shrimp (Palaeocaris) cuticle
Invertebrate 4	YPM 50639 Horseshoe crab (Euproops) cuticle
Invertebrate 5	YPM 53988 Shrimp (Acanthotelson) cuticle
Invertebrate 6	YPM 53990 Shrimp (Acanthotelson) cuticle
Annelid 1	YPM 539746 Polychaete (Esconites) bristle [chitin]
Annelid 2	YPM 539746 Polychaete (Esconites) jaw [crosslinked collagen]
Vertebrate 1	FMNH PE 7063 Tullimonstrum eye
Vertebrate 2	FMNH PE 7063 Tullimonstrum tooth
Vertebrate 3	FMNH PE 40113 Tullimonstrum eye
Vertebrate 4	FMNH PE 40113 Tullimonstrum eye bar
Vertebrate 5	FMNH PE 40113 Tullimonstrum notochord
Vertebrate 6	FMNH PE 22056 Tullimonstrum buccal apparatus region
Vertebrate 7	FMNH PE 22056 Tullimonstrum tooth
Vertebrate 8	FMNH PE 22056 Tullimonstrum tooth
Vertebrate 9	FMNH PE 22056 Tullimonstrum tooth
Invertebrate 7	FMNH PE 39344 Mollusc (Paleocadmus) radula
Vertebrate 10	YPM 7764 Chondrychthian egg case (Paleoxyris)
Vertebrate 11	FMNH PE 8167 chordate (Mayomyzon) eye
Vertebrate 12	FMNH PE 8488 chordate (Gilpichthys) tooth
Vertebrate 13	FMNH PE 8904 chordate (Mayomyzon) eye
Vertebrate 14	FMNH PE 8488 chordate (Gilpichthys) tooth
Vertebrate 15	FMNH PE 5688 chordate (Mayomyzon) cartilaginous plate
Vertebrate 16	FMNH PE 8904 chordate (Gilpichthys) tooth
Vertebrate 17	FMNH PE 8348 chordate (Gilpichthys) tooth
Vertebrate 18	FMNH PE 8167 chordate (Mayomyzon) eye
Vertebrate 19	FMNH PE 8348 chordate (Gilpichthys) tooth
Vertebrate 20	FMNH PE 8449 chordate (Gilpichthys) tooth
Vertebrate 21	FMNH PE 15354 chordate chondrychthian tooth
Vertebrate 22	FMNH PE 15354 chordate (Gilpichthys) tooth
Plant 1	PP 26465 Neuropteris vermicularis leaf
Plant 2	PP 39376 Diplozites unita leaflet
Plant 3	Uncatalogued (1) Alethopteris serlii leaf
Plant 4	Uncatalogued (2) Pecopteris sp. leaflet
Coprolite 1	FMNH PE52316
Coprolite 2	FMNH PE52336
